# Supplementary material for: Health status, quality of life and medical care in adult women with Turner syndrome
Source: PubMed Central journal article supplement — Endocr Connect. 2018 Mar 7;7(4):534–43. doi: 10.1530/EC-18-0053 (PMC5881433; doi:10.1530/ec-18-0053), 2018-03-07
Supplement: ec-7-534-t001.pdf [file ec-7-534-t001.pdf]

**Suppl. Table I: Quality of life (QoL) scores distribution for the 8 sub-qualities using SF-36v2**

|                                             | <b>Minimum</b> | <b>Lower<br/>Quartile</b> | <b>Median</b> | <b>Upper<br/>Quartile</b> | <b>Maximum</b> |
|---------------------------------------------|----------------|---------------------------|---------------|---------------------------|----------------|
| <b>Physical functioning</b>                 | 32.7           | 53.7                      | 55.6          | 57.5                      | 57.5           |
| <b>Role physical</b>                        | 21.2           | 48.2                      | 57.2          | 57.2                      | 57.2           |
| <b>Bodily pain</b>                          | 30.1           | 55.6                      | 62            | 62                        | 62             |
| <b>General health</b>                       | 23.7           | 50.8                      | 54.4          | 59.4                      | 66.5           |
| <b>Vitality</b>                             | 28.8           | 49.6                      | 52.6          | 58.5                      | 64.5           |
| <b>Social functioning</b>                   | 27.3           | 47.3                      | 57.3          | 57.3                      | 57.3           |
| <b>Role emotional</b>                       | 14.4           | 45.7                      | 49.2          | 56.2                      | 56.2           |
| <b>Mental health</b>                        | 19.5           | 43                        | 50.9          | 53.5                      | 58.7           |
| <b>Mental component<br/>summary (MCS)</b>   | 18.5           | 42.9                      | 48.9          | 54.4                      | 58.1           |
| <b>Physical component<br/>summary (PCS)</b> | 32.8           | 54.8                      | 57            | 59.1                      | 65.3           |
