# Supplementary material for: Health status, quality of life and medical care in adult women with Turner syndrome
Source: PubMed Central journal article supplement — Endocr Connect. 2018 Mar 7;7(4):534–43. doi: 10.1530/EC-18-0053 (PMC5881433; doi:10.1530/ec-18-0053), 2018-03-07
Supplement: ec-7-534-t002.pdf [file ec-7-534-t002.pdf]

**Suppl. Table II: Correlations of different variables of interest to sub-scales of QoL**

|                                                           |          | <b>PF</b> | <b>RP</b>     | <b>BP</b>     | <b>GH</b>     | <b>V</b> | <b>SF</b> | <b>RE</b> | <b>MH</b> | <b>PCS*</b>   | <b>MCS</b> |
|-----------------------------------------------------------|----------|-----------|---------------|---------------|---------------|----------|-----------|-----------|-----------|---------------|------------|
| <b>Current estrogen substitution objective estimation</b> | <b>r</b> | -0.10     | 0.033         | <b>-0.39*</b> | <b>-0.36*</b> | -0.22    | -0.17     | -0.20     | -0.23     | -0.19         | -0.20      |
|                                                           | <b>p</b> | 0.53      | 0.84          | 0.01          | 0.02          | 0.17     | 0.29      | 0.23      | 0.15      | 0.25          | 0.10       |
| <b>Depression</b>                                         | <b>r</b> | 0.12      | 0.211         | 0.07          | -0.02         | -0.05    | 0.06      | 0.05      | -0.15     | 0.09          | -0.08      |
|                                                           | <b>p</b> | 0.47      | 0.20          | 0.67          | 0.87          | 0.76     | 0.69      | 0.72      | 0.37      | 0.55          | 0.61       |
| <b>Final height SDS</b>                                   | <b>r</b> | 0.25      | 0.10          | 0.24          | 0.08          | 0.08     | 0.04      | -0.12     | 0.01      | <b>0.03*</b>  | -0.07      |
|                                                           | <b>p</b> | 0.12      | 0.53          | 0.15          | 0.61          | 0.63     | 0.77      | 0.45      | 0.93      | 0.03          | 0.65       |
| <b>BMI</b>                                                | <b>r</b> | -0.23     | -0.07         | -0.08         | -0.01         | -0.06    | -0.02     | 0.04      | 0.05      | <b>-0.32*</b> | 0.08       |
|                                                           | <b>p</b> | 0.16      | 0.66          | 0.60          | 0.92          | 0.70     | 0.87      | 0.78      | 0.73      | 0.04          | 0.60       |
| <b>Level of education</b>                                 | <b>r</b> | 0.06      | <b>0.46**</b> | 0.15          | -0.15         | -0.09    | 0.08      | -0.10     | -0.24     | <b>0.49**</b> | -0.19      |
|                                                           | <b>p</b> | 0.72      | 0             | 0.36          | 0.37          | 0.57     | 0.62      | 0.54      | 0.15      | 0             | 0.25       |
| <b>Current medical care subjective estimation</b>         | <b>r</b> | -0.20     | 0.33          | -0.15         | -0.21         | -0.05    | 0.13      | -0.15     | -0.17     | 0             | -0.03      |
|                                                           | <b>p</b> | 0.26      | 0.06          | 0.39          | 0.24          | 0.77     | 0.46      | 0.40      | 0.34      | 1.0           | 0.84       |
| <b>Current medical care</b>                               | <b>r</b> | -0.10     | -0.01         | -0.25         | -0.15         | -0.02    | 0.08      | 0.17      | 0.15      | -0.26         | 0.18       |
|                                                           | <b>p</b> | 0.53      | 0.90          | 0.11          | 0.35          | 0.88     | 0.62      | 0.30      | 0.34      | 0.10          | 0.27       |

|                                            |          |       |       |      |       |       |       |              |       |       |       |
|--------------------------------------------|----------|-------|-------|------|-------|-------|-------|--------------|-------|-------|-------|
| <b>objective estimation</b>                |          |       |       |      |       |       |       |              |       |       |       |
| <b>Pubertal development</b>                | <b>r</b> | -0.08 | 0.17  | 0.16 | -0.03 | 0.18  | 0.18  | <b>0.37*</b> | 0.23  | -0.16 | 0.29  |
|                                            | <b>p</b> | 0.59  | 0.28  | 0.33 | 0.83  | 0.26  | 0.27  | 0.02         | 0.15  | 0.32  | 0.06  |
| <b>Followed-up by general practitioner</b> | <b>r</b> | 0.01  | -0.06 | 0.04 | -0.11 | -0.21 | -0.03 | -0.23        | -0.18 | 0.16  | -0.23 |
|                                            | <b>p</b> | 0.93  | 0.69  | 0.77 | 0.47  | 0.19  | 0.82  | 0.16         | 0.25  | 0.33  | 0.15  |

\* Correlation is significant at the p 0.05 level, \*\* Correlation is significant at the p 0.01 level
